# Supplementary material for: Teaching first-year medical students in basic clinical and procedural skills − A novel course concept at a medical school in Austria
Source: PubMed Central journal article supplement — GMS Z Med Ausbild. 2014 Feb 17;31(1):Doc6. doi: 10.3205/zma000898 (PMC3935167; doi:10.3205/zma000898), 2014-02-17
Supplement: ZMA-31-6-s-001.pdf [file ZMA-31-6-s-001.pdf]

**Appendix 1:** Clerkships and clinical electives during the first three years of study at the Medical University of Graz.

**1./2. semester:**

➤ Track “Introduction to medicine” (8 ECTS points):

Practical work in a hospital ward with accompanying seminar, fundamentals in communication, introduction to various medical fields and general medicine in particular, insight in ethics and evidence-based medicine, practical training of first aid and physical examination

➤ Track “Medical skills I” (2 ECTS points):

Exploration of the extramural medical field with accompanying seminar

➤ **“Clinical Elective License” (1 ECTS point)**

**3./4. semester:**

➤ Track “Medical skills IIa/b” (2 ECTS points):

First aid, unconsciousness, dyspnea, circulatory shock, cardiopulmonary resuscitation, traumatology, pediatric emergencies; rescue services practical training

➤ Track “Communication – Supervision – Reflection I” (2 ECTS points):

Psycho-social and psychosomatic medicine

**5./6. semester:**

➤ Module 16 “Visceral function and modulation” (9 ECTS points):

Visual diagnosis, heart and lung auscultation, physical examination, venous cannulation (minimum of 34 training hours)

➤ Module 17 “Visceral structure and intervention” (8 ECTS points):

Surgical suturing techniques (minimum of 21 training hours)

➤ Track “Communication – Supervision – Reflection II” (1 ECTS point):

Ethics in medicine

### **Clinical electives**

Electives are clinical activities in medical specialties of students' choice. During the second stage of study, students have to complete 16 weeks (560 hours) of mandatory electives in the lecture-free period. Electives should be undertaken at clinical departments; however, four weeks of electives can be spent at pre-clinical institutions (e.g. pathology, medical psychology) and further four weeks at radiology departments. It is recommended to carry out four weeks of clinical training after the 2<sup>nd</sup>, 3<sup>rd</sup>, 4<sup>th</sup>, and 5<sup>th</sup> year of study, respectively.

Successful completion of the first stage of study as well as of the “Clinical Elective License” is mandatory for every student before undertaking clinical electives.
